# Supplementary material for: Fundamental properties of oligo double-stranded DNA/single-walled carbon nanotube nanobiohybrids
Source: Royal Society of Chemistry journal article supplement (doi:10.1039/c0nr00145g), 2010-01-01
Supplement: c0nr00145g.pdf [file c0nr00145g.pdf]

## Stability of Single-walled Carbon Nanotubes/Oligo DNA Hybrids in Water

Yuki Yamamoto,<sup>a</sup> Tsuyohiko Fujigaya,<sup>a</sup> Yasuro Niidome,<sup>a</sup>  
and Naotoshi Nakashima<sup>a,b\*</sup>

<sup>a</sup> Department of Applied Chemistry, Graduate School of Engineering,  
Kyushu University, 744 Motoooka, Fukuoka 819-0395, Japan

<sup>b</sup> Japan Science and Technology Agency, CREST, 5 Sanbancho, Chiyoda-ku, Tokyo 102-0075, Japan

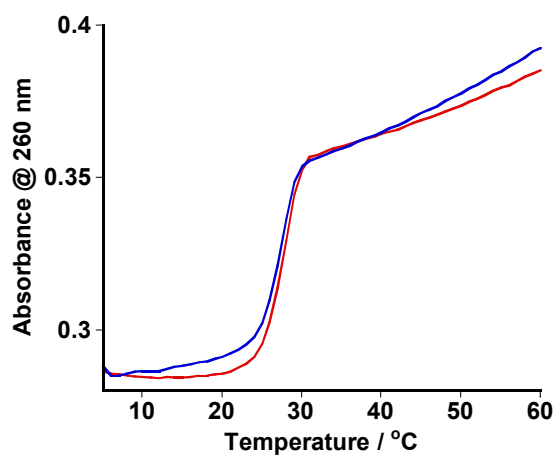

Fig. S1 Melting curve of (dA)<sub>20</sub>/(dT)<sub>20</sub> in a tris-EDTA buffer before (red) and after (blue) sonication.

\*Corresponding author. E-mail: [nakashima-tcm@mail.cstm.kyushu-u.ac.jp](mailto:nakashima-tcm@mail.cstm.kyushu-u.ac.jp). Fax: +81-92-802-2840.

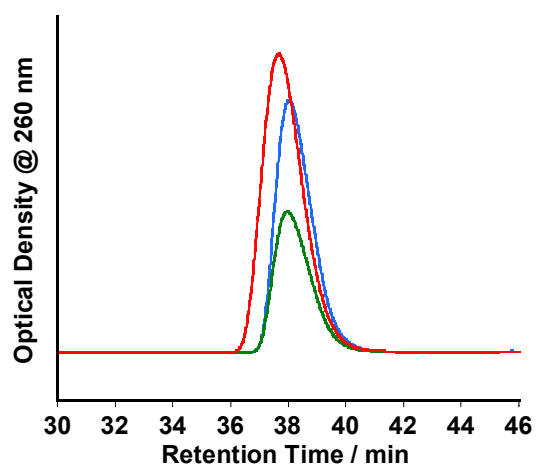

Fig. S2 SEC chromatograms of the three different oligo-DNA solutions, (dA)<sub>20</sub>/(dT)<sub>20</sub> (red), (dA)<sub>20</sub> (blue) and (dT)<sub>20</sub> (green).

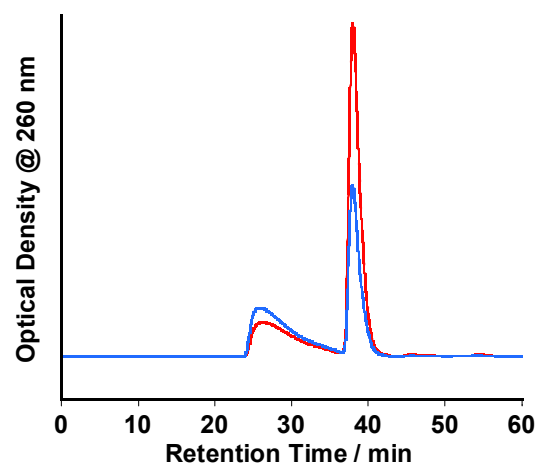

Fig. S3 SEC chromatograms of SWNT solutions solubilized using (dA)<sub>20</sub> (red) and (dT)<sub>20</sub> (blue), respectively.

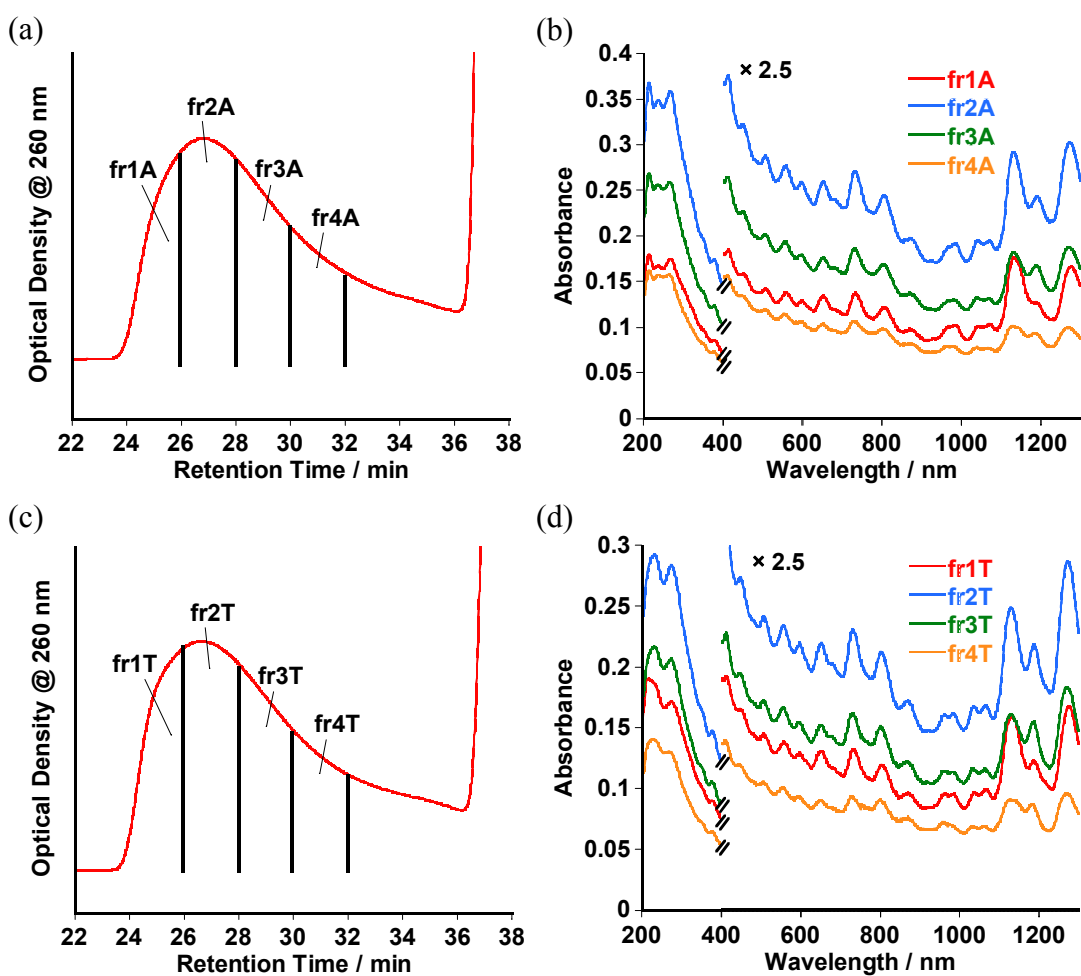

Fig. S4 Chromatogram of (dA)<sub>20</sub> (a)- or (dT)<sub>20</sub> (c)-solubilized SWNT solutions and UV-vis-near IR absorption spectra of fractionated SWNT solutions: fr1A - fr4A (b) and fr1T - fr4T (d).

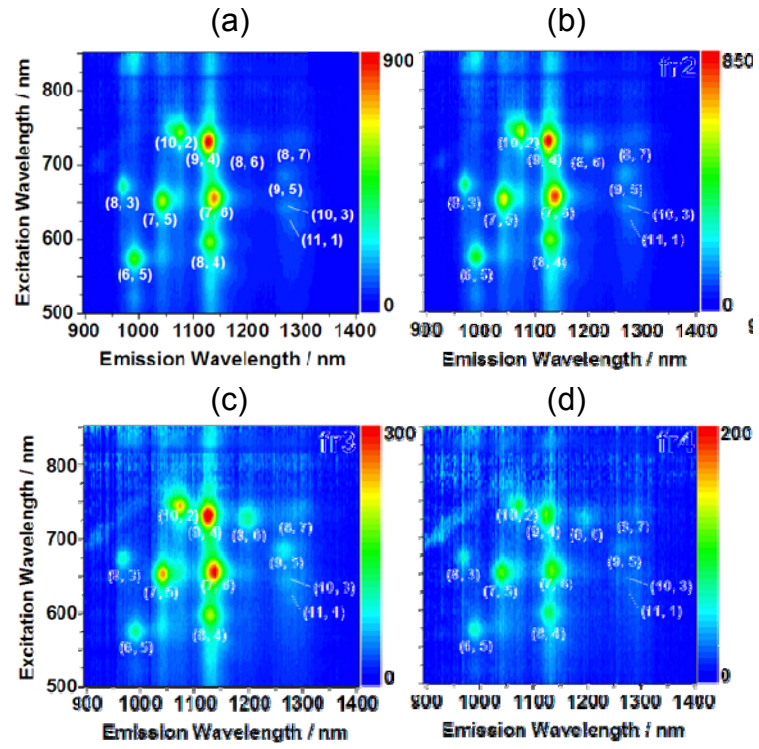

Fig. S5 Near-IR photoluminescence of the fractionated samples: fr1A (a), fr2A (b), fr3A (c) and fr4A (d).



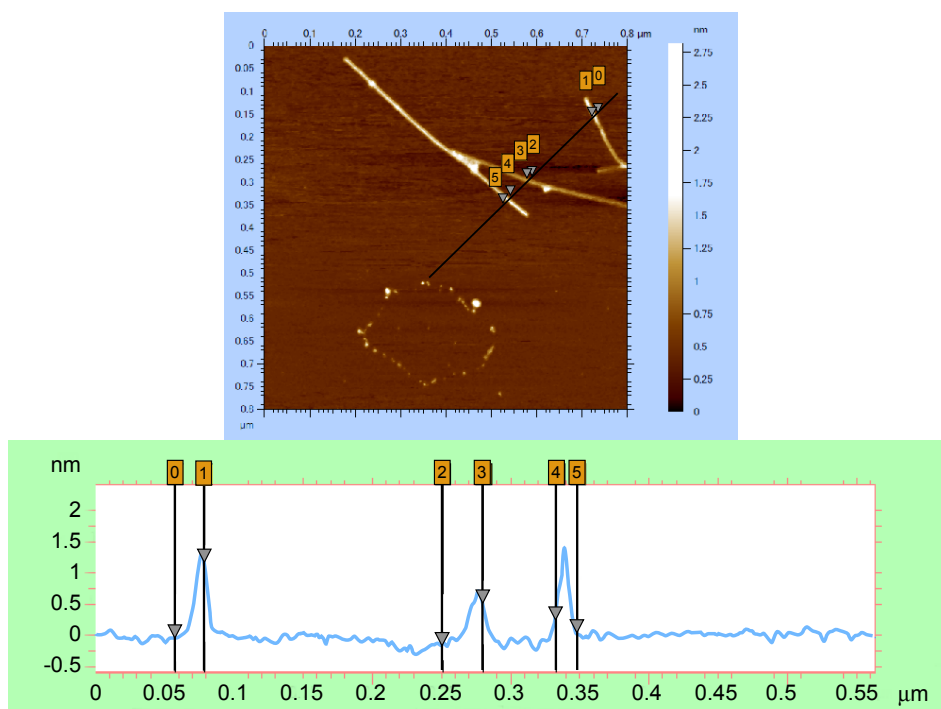

Fig. S7 AFM image (top) of the (dA)<sub>20</sub>/(dT)<sub>20</sub>/SWNT hybrid and its height profile (bottom).

Table S1 Concentrations of oligo DNA, SWNT and unbound oligo DNA in each fraction.<sup>i)</sup>

| fraction | DNA concentration<br>/ nM | SWNT concentration<br>/ nM | Unbound DNA concentration / nM (their contents / %) |              |               |
|----------|---------------------------|----------------------------|-----------------------------------------------------|--------------|---------------|
|          |                           |                            | 3 days after                                        | 1 week after | 1 month after |
| fr1      | 45                        | 10                         | 2 (5)                                               | 2 (5)        | 11 (24)       |
| fr2      | 107                       | 35                         | 2 (2)                                               | 3 (3)        | 5 (4)         |
| fr3      | 88                        | 37                         | 2 (2)                                               | 2 (2)        | 2 (3)         |
| fr4      | 63                        | 35                         | 1 (2)                                               | 1 (2)        | 2 (3)         |
| fr1A     | 108                       | 10                         | 3 (3)                                               | 4 (3)        | 5 (5)         |
| fr2A     | 275                       | 41                         | 5 (2)                                               | 7 (2)        | 10 (4)        |
| fr3A     | 230                       | 48                         | 4 (2)                                               | 5 (2)        | 6 (3)         |
| fr4A     | 150                       | 42                         | 3 (2)                                               | 4 (3)        | 5 (3)         |
| fr1T     | 86                        | 10                         | 3 (4)                                               | 4 (4)        | 4 (5)         |
| fr2T     | 180                       | 35                         | 4 (2)                                               | 5 (3)        | 6 (3)         |
| fr3T     | 160                       | 40                         | 3 (2)                                               | 3 (2)        | 4 (2)         |
| fr4T     | 112                       | 37                         | 2 (2)                                               | 2 (2)        | 3 (3)         |

<sup>i)</sup> SWNT concentrations were determined using absorbance at 280 nm of an SDS-solubilized SWNT aqueous solution and the absorbance coefficient reported by H. Shinohara et al. (*Phys. Chem. Chem. Phys.* 2009, **11**, 1091-1097). Oligo DNA concentrations were estimated using the increment of the UV spectra at 280 nm of each fraction. Unbound oligo DNA concentrations were estimated using the areas of each peak around 38 min of the SEC-HPLC based on the calibration curve between the oligo DNA concentrations and SEC-HPLC peak areas. The contents of the unbound DNA were calculated from the ratios of the total DNA concentrations and unbound DNA concentrations.
